# Supplementary material for: A novel Gardnerella, Prevotella, and Lactobacillus standard that improves accuracy in quantifying bacterial burden in vaginal microbial communities
Source: PubMed Central journal article supplement (PMC10315654; doi:10.3389/fcimb.2023.1198113), 2023-06-19

# Supplemental Figure 1

A

Two-step qPCR protocol

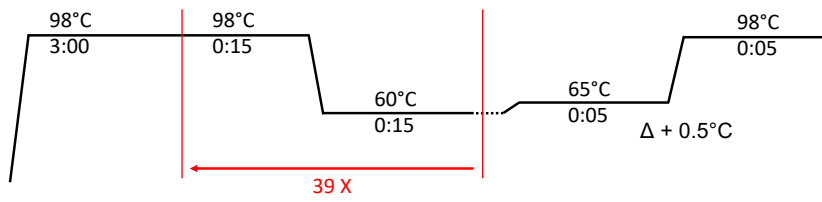

B

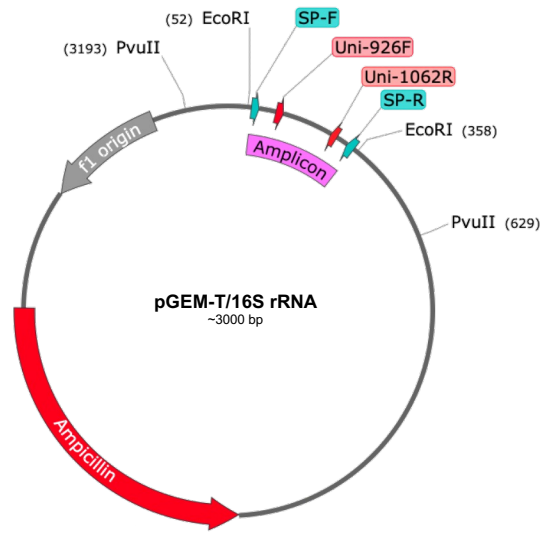



# Supplemental Figure 3

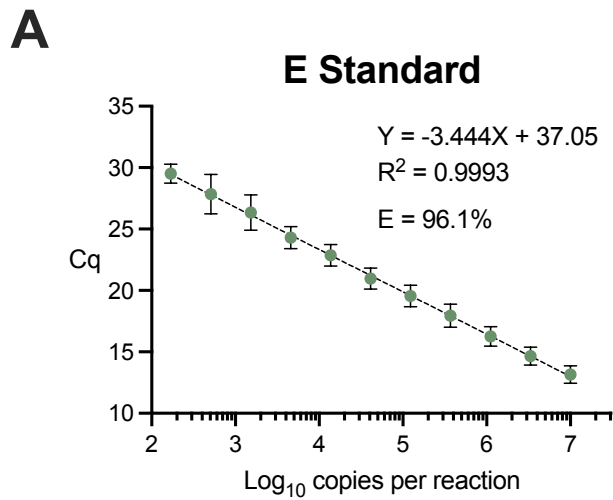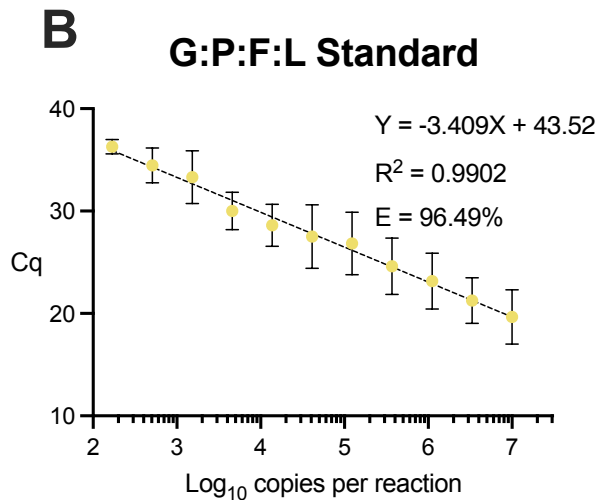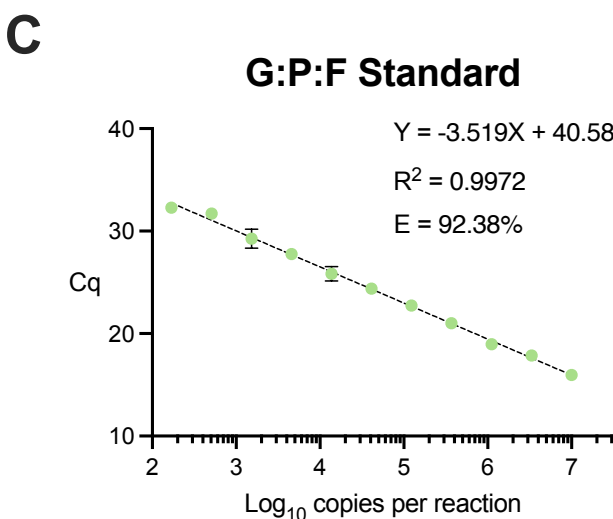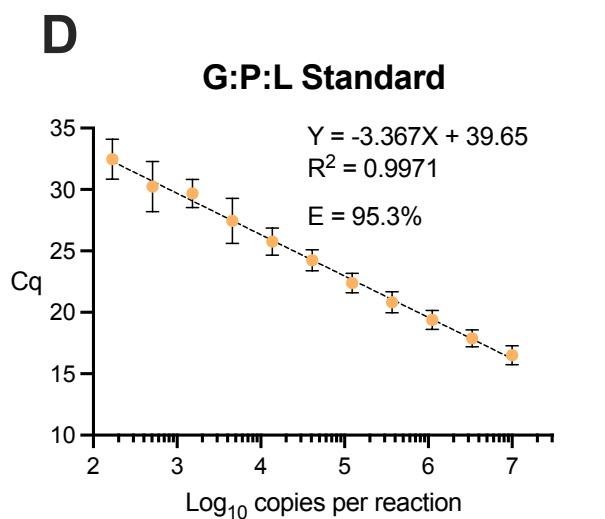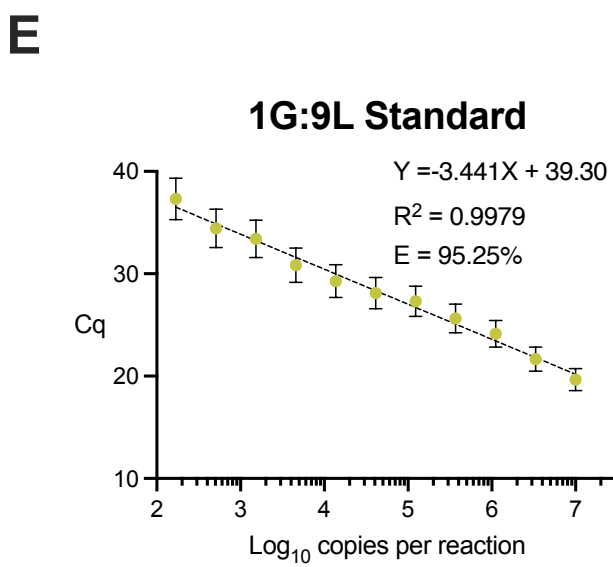

# Supplemental Figure 4

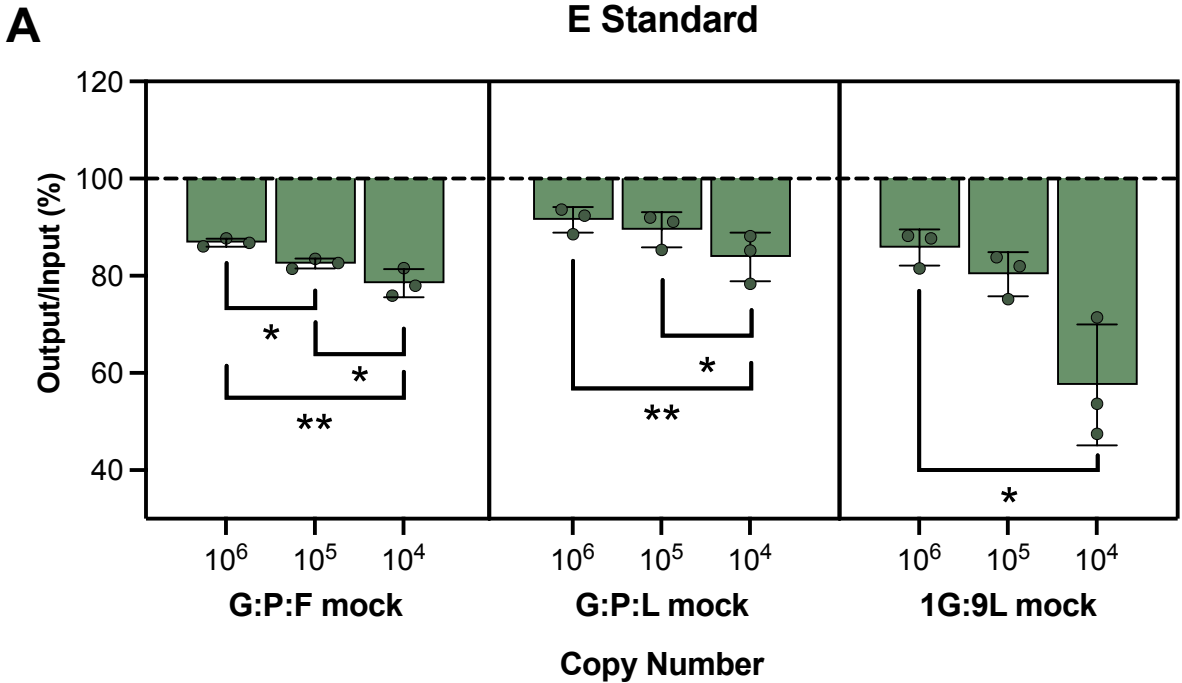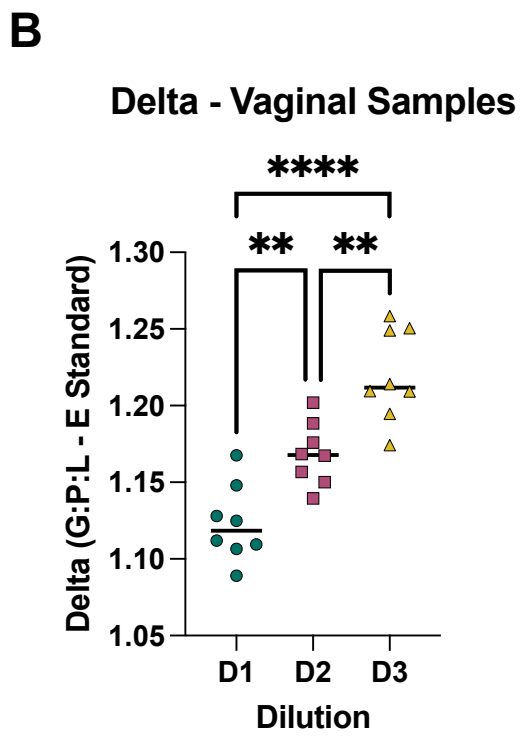

Supplement: DataSheet_1.pdf [file DataSheet_1.pdf]
